# Supplementary material for: maxdLoad2 and maxdBrowse: standards-compliant tools for microarray experimental annotation, data management and dissemination
Source: Springer Nature journal article supplement (doi:10.1186/1471-2105-6-264), 2005-11-03
Supplement: 12859_2005_589_MOESM5_ESM.pdf [file 12859_2005_589_MOESM5_ESM.pdf]

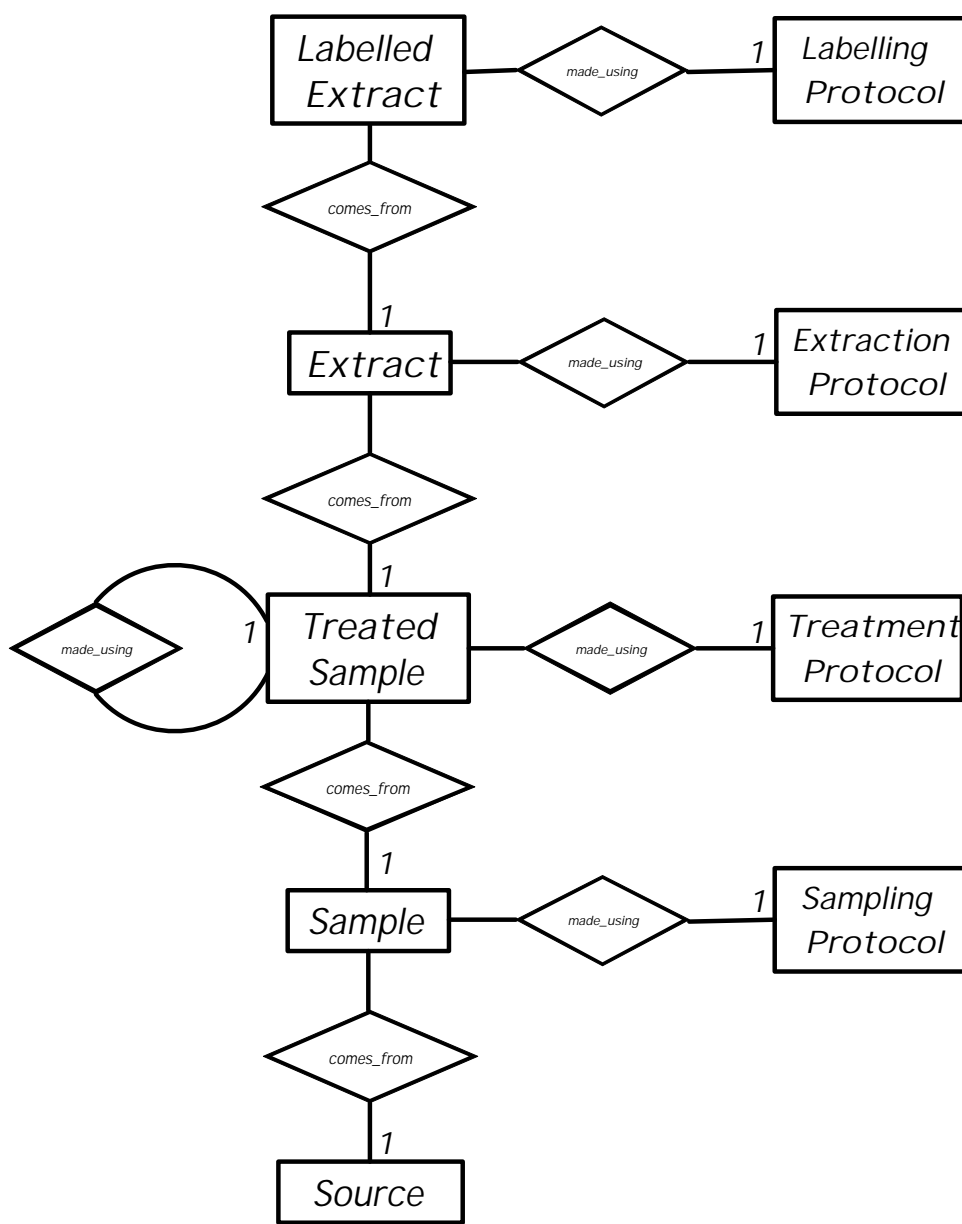

1. BioMaterials

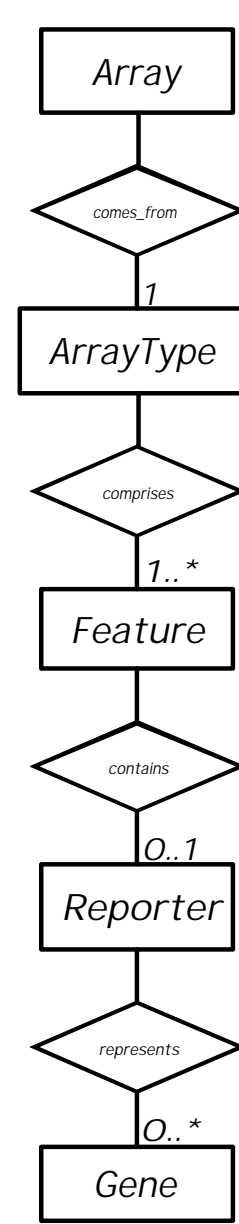

2. MicroArray

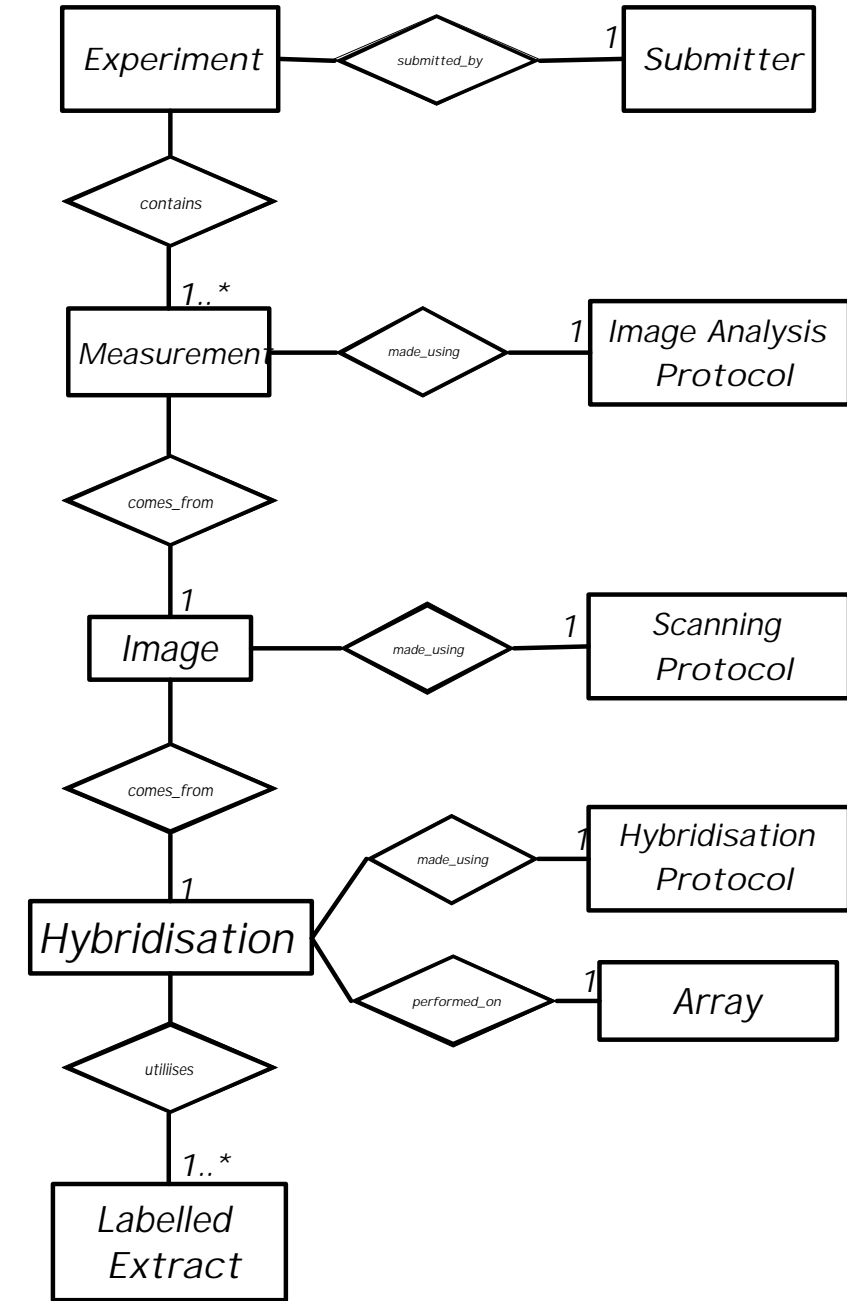

3. Experiment
